# Supplementary material for: A specific N-terminal extension of the 8 kDa domain is required for DNA end-bridging by human Polµ and Polλ
Source: PubMed Central journal article supplement — Nucleic Acids Res. 2013 Aug 8;41(19):9105–16. doi: 10.1093/nar/gkt681 (PMC3799444; doi:10.1093/nar/gkt681), 2013-08-08
Supplement: supp_gkt681_nar-00598-v-2013-File009.pdf [file supp_gkt681_nar-00598-v-2013-File009.pdf]

## SUPPLEMENTARY MATERIALS AND METHODS

**Partial proteolysis.** Proteolytic digestion was performed in 50 mM Tris-HCl (pH 7.5), 1 mM DTT, 10% (v/v) glycerol, the indicated amounts of purified polymerase and proteinase K. After incubation for 1 min at 25 °C the reaction was stopped by addition of 6x loading buffer and analyzed by SDS-12% PAGE for Pol $\lambda$  and 10% PAGE for Pol $\mu$ . The gels were stained with Coomassie.

**Mass spectrometry analysis.** The proteomic Molecular Weight Analysis was carried out in the CBMSO protein chemistry facility (a member of ProteoRed network). For the reverse-phase liquid chromatography mass-spectrometry (RP-LC-MS/MS) analysis, gel bands were digested *in situ* with trypsin (5 ng/ $\mu$ l; Promega) for 1 h in an ice-bath. Stained protein gel bands were incubated in 50 mM NH<sub>4</sub>HCO<sub>3</sub> (BA) prior to reduction with 10 mM DTT and alkylation with 55 mM iodoacetamide, both in 50 mM BA. Digestion buffer was removed and gels were covered again with 50 mM BA and incubated for 12 h at 37°C.

Whole supernatants were dried down and then desalted onto ZipTip C18 Pipette tips (Millipore) until the mass spectrometric analysis. Peptide mass fingerprinting was conducted using an Autoflex™ (Bruker Daltonics, Bremen, Germany) mass spectrometer in a positive ion reflector mode employing 2,5-dihydroxybenzoic acid as matrix and an AnchorChip™ surface target (Bruker Daltonics). Peak identification and monoisotopic peptide mass assignment were performed automatically using Flexanalysis™ software, version 2.2 (Bruker Daltonics). Database searches were performed using MASCOT <http://matrixscience.com> against the NCBI non-redundant protein sequence database <http://www.ncbi.nih.gov>. The selected search parameters were as follows: tolerance of two missed cleavages, carbamidomethylation (Cys) and oxidation (Met) as fixed and variable modifications, respectively, and setting peptide tolerance to 100 ppm after close-external calibration. A significant MASCOT probability score ( $p < 0.05$ ) was considered as condition for successful protein identification.

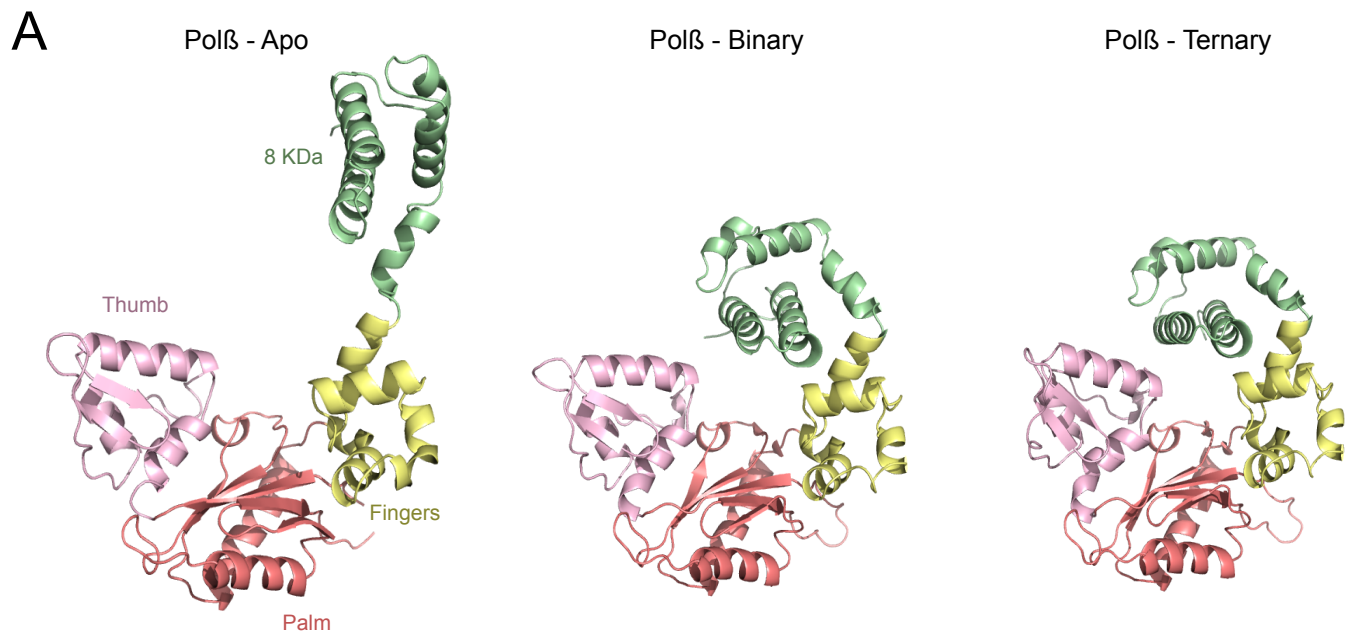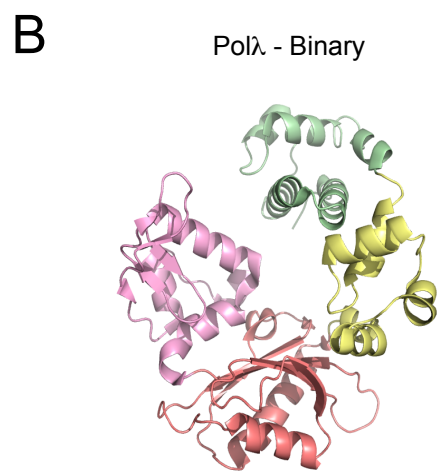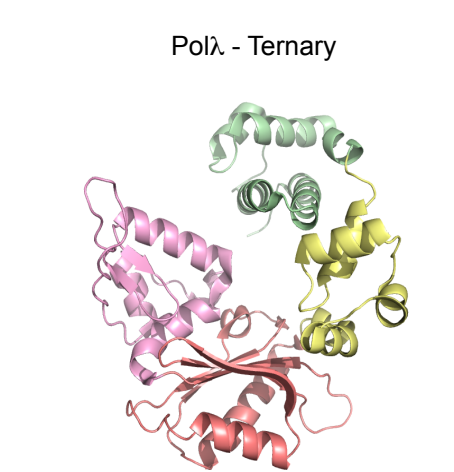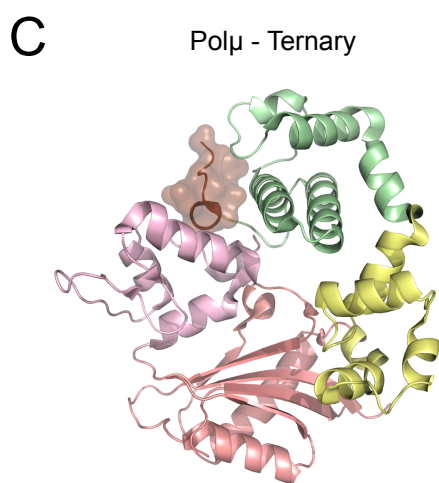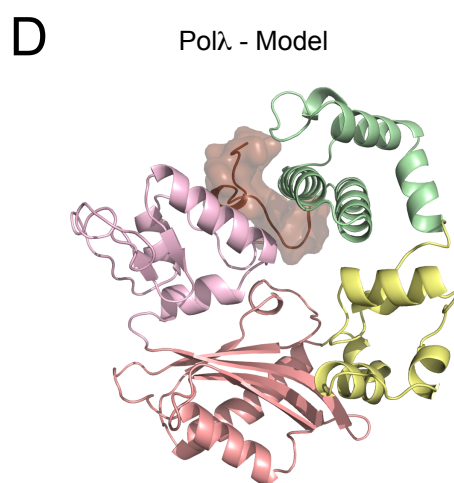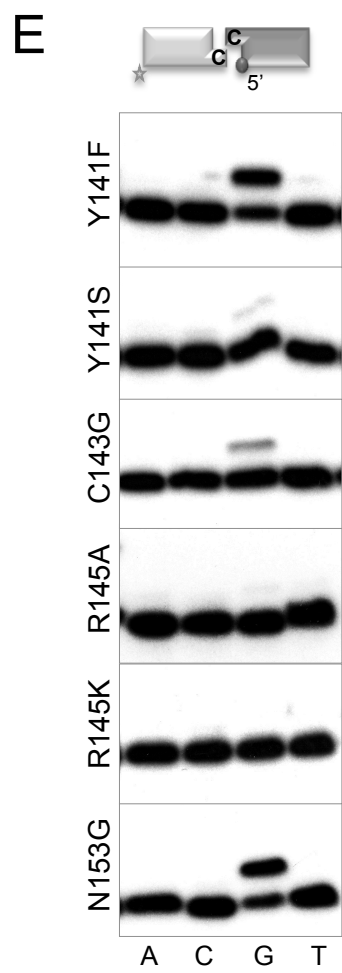

**Supplementary Figure 1. Comparison of domain movements during the catalytic cycle in different members of the X family.** A) Cartoon representations of the apoenzyme, binary and ternary complexes of Pol $\beta$ , showing the movements of the different domains, colored as follows: 8 kDa in green, fingers in yellow, palm in red and thumb in pink. B) and C) Cartoon representations of the binary and ternary complex of Pol $\lambda$  and of the ternary complex of Pol $\mu$  with the same domain coloring as in A). D) Structural model of Pol $\lambda$  core containing the brooch, with the same domain coloring as in A). The brooch is shown in cartoon and semitransparent surface colored in brown. E) NHEJ reactions were performed with 200 nM Pol $\mu$  mutants and using two sets of substrates: the labelled substrates contain 1C and 1D-NHEJ, and the cold substrates, 2C and 2D-NHEJ. The dark spheres indicate the presence of a 5'-P group, which forces binding of this substrate to the 8 kDa domain of Pol $\mu$  and thus its usage as the downstream part of the break. ddNTPs were added separately at 1 mM in the presence of 2.5 mM MgCl<sub>2</sub>. After electrophoresis, labelled fragments were detected by autoradiography.

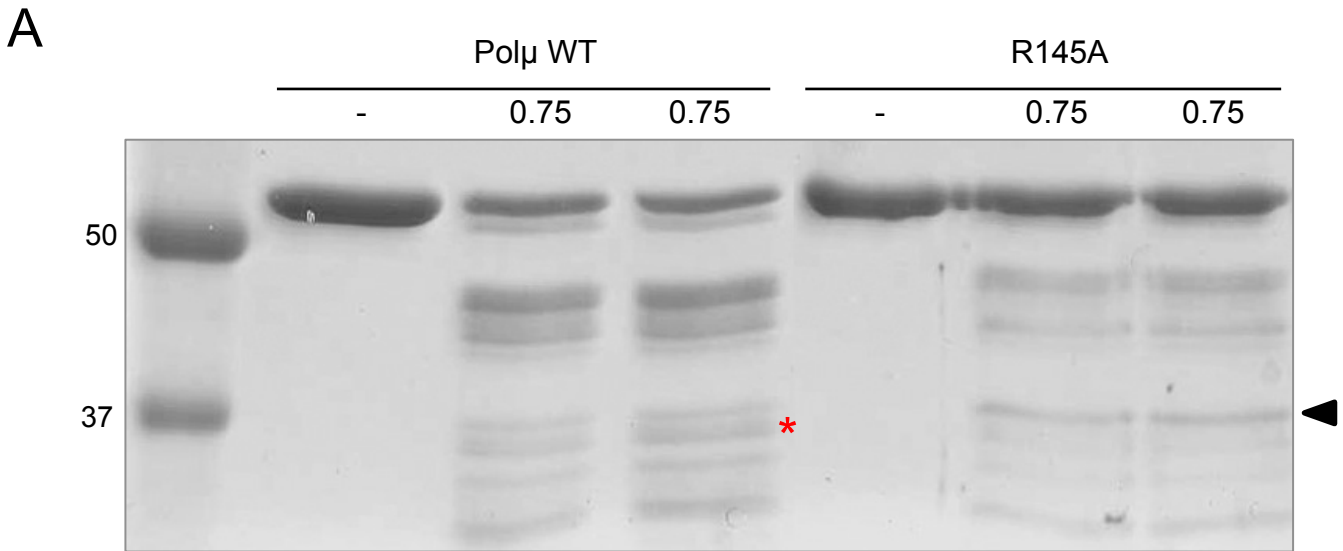

**B**

MLPKRRRARVGSPPSGDAASSTPPSTR**FPGVAIYLV**EP**RMGRSR****RAFLTGLARSKGFR**VLDACS  
 SEATHVVMEEETSAEEAVSWQERRMAAAPPGCTPPALLDISWLTESLGAGQPVPVECR**HRLEVA**  
**GPR**KGPLSPA**WMPA****YACQR**PTPLTHHNTGLSEALEILAEAAGFEGSEGR**LLTFCRAASVLKAL**  
**PSPVTTLSQLQGLPHFGEHSSR**VVQELLEHGVC**EEVERVRRSERYQTMKLF**TQ**IFGVGVKTAD**  
**RWYREGLRTLDDLREQPQKLTQQQKAGLQHHQDLSTPVLRSDVDALQQVVEEAVGQALPGATV**  
**TLTGGFR**R**GKLQGHVD**FLI**THPKEGQEAGLLPRV**MCRLQDQGLILYHQHQHSCCESPTR**L**AQ  
**QSHMDAFERSFCIFR**L**PQPPGAAVGGSTR****PCPSWKAVR**VDLVVAPVSQFPFALLGWTGSK**L**EQ  
 RELRRFSRKEK**GLWLN**SHGLFDPEQ**K**TF**FQA**SEEDIFRHLGLEYL**PPEQR**NA

**C**

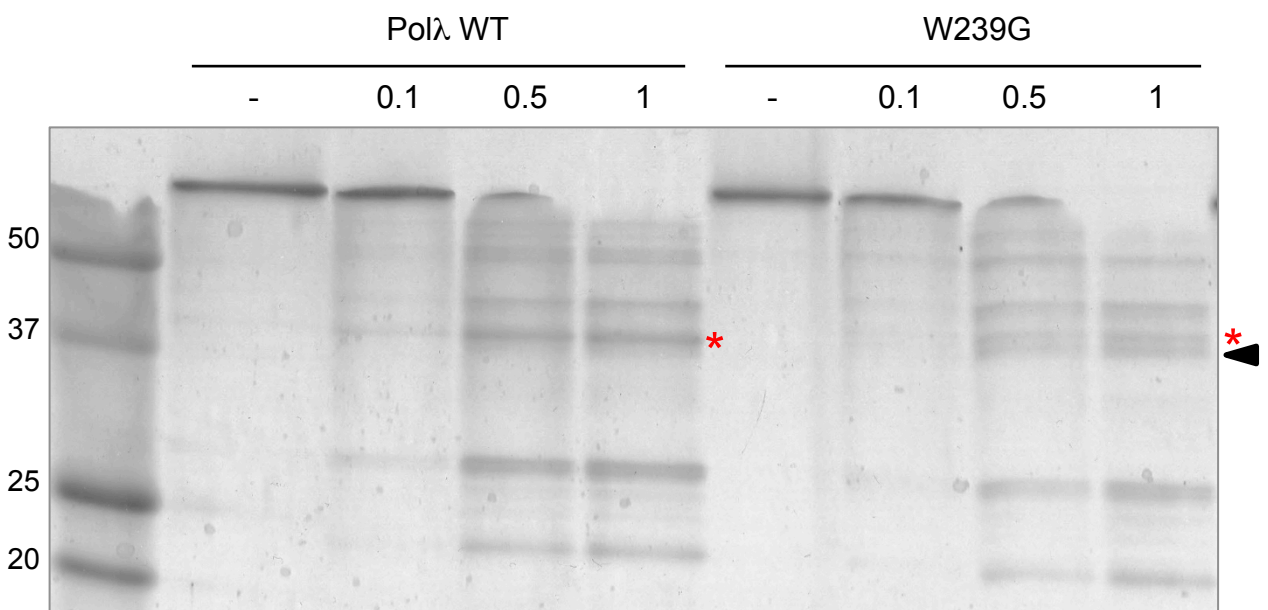

**Supplementary Figure 2. Proteolytic analyses of brooch mutants.** A) Partial proteolysis of purified wild-type Pol $\mu$  and R145A mutant (4  $\mu$ g each) were performed as indicated in Materials and Methods, incubation time was 1 min in the presence of the indicated amounts (ng) of proteinase K. The arrowhead indicates the new band appearing in the brooch mutant. The red asterisk indicates the size of the polymerase core. B) Sequence of wild-type Pol $\mu$ , showing the peptides detected by mass-spec in bold. In black, the peptides found in both samples, wild-type and mutant. In red, the peptides that were only found in the wild-type sample but not in the mutant band indicated in A). In orange, the peptides found in this mutant band in very low amount. The brooch is indicated in blue&bold. C) Partial proteolysis of purified wild-type Pol $\lambda$  and W239G mutant (5  $\mu$ g) was performed with the indicated amounts of proteinase K.

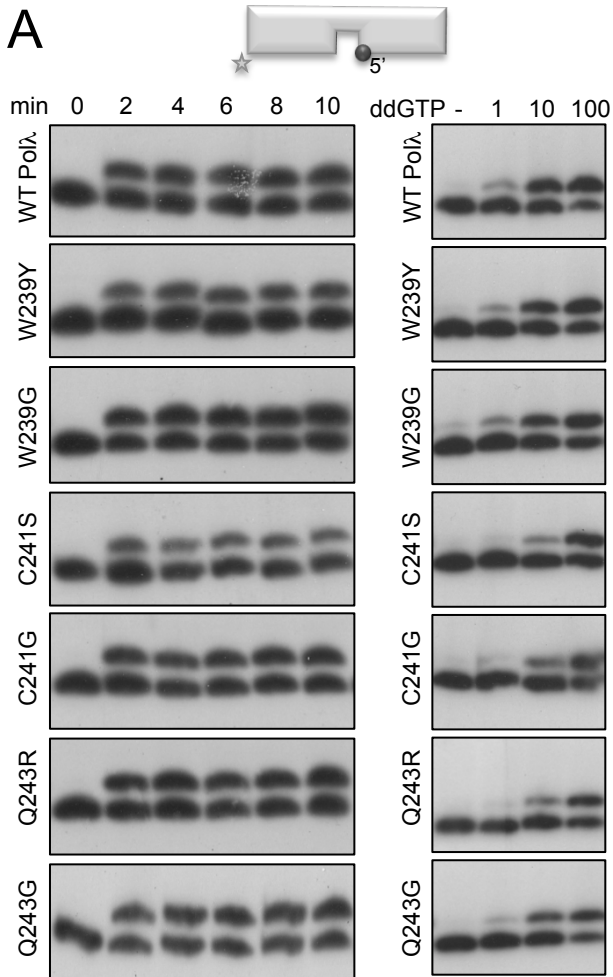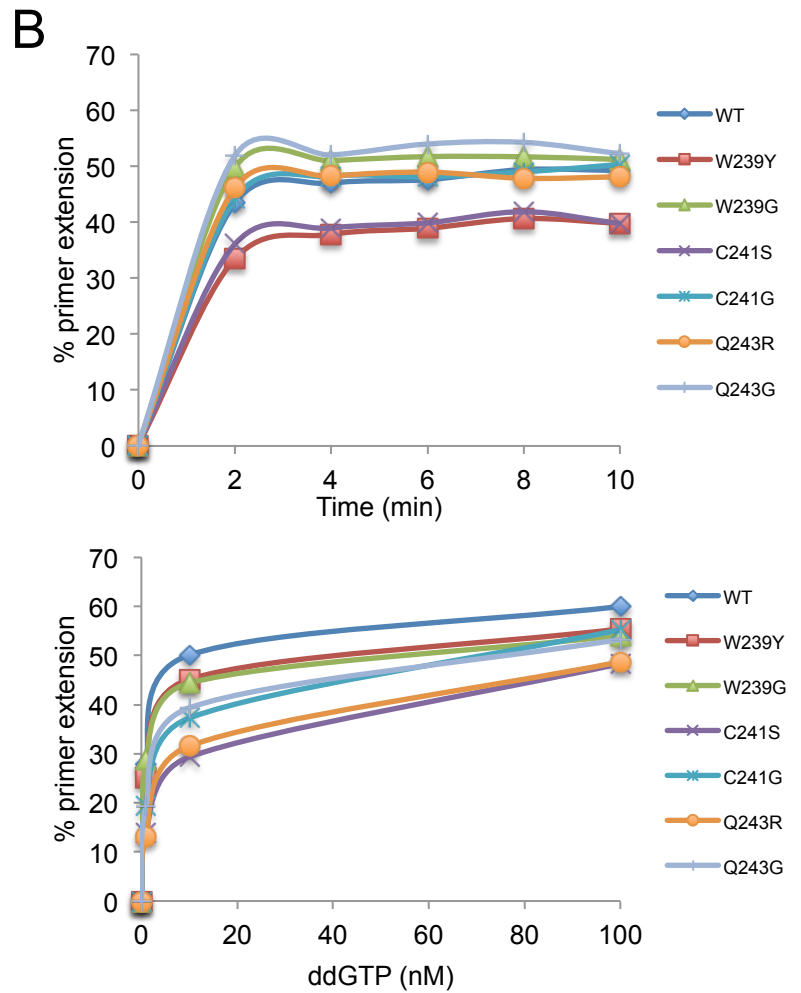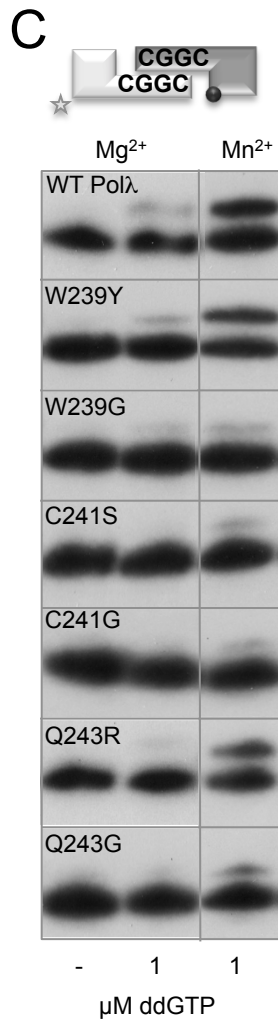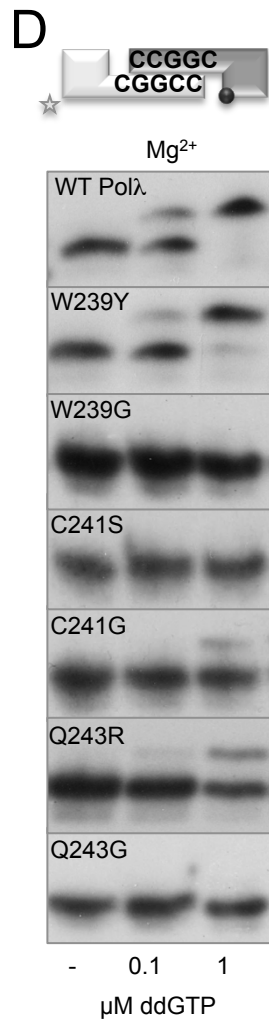

**Supplementary Figure 3. The brooch in Pol $\lambda$  facilitates polymerization on NHEJ substrates.** A) Gap-filling reactions were performed as described in Materials and Methods with the wild-type Pol $\lambda$  and the indicated mutants (50 nM) in the presence of 2.5 mM MgCl<sub>2</sub> at 30 °C, using a gapped substrate containing the oligonucleotides SP1C, T13C and DG1-P. Left panels show time courses performed with 10 nM ddGTP, right panels show ddGTP concentration courses incubated for 20 min. B) Quantification of the experiments shown in A). C) NHEJ reactions were performed as described with the wild type Pol $\lambda$  and the indicated mutants (500 nM) in the presence of the indicated concentrations of ddGTP and either 2.5 mM MgCl<sub>2</sub> or 0.1 mM MnCl<sub>2</sub> at 30°C for 60 min. Two separate sets of substrates were used: the labelled substrate (light grey) was formed by hybridization of D3 and D1, and the cold substrate (dark grey), by hybridization of D4 with D2-P. D) NHEJ reactions were performed as described in Materials and Methods with the wild type Pol $\lambda$  and the indicated mutants (500 nM) in the presence of the indicated concentrations of ddGTP and 2.5 mM MgCl<sub>2</sub> at 30°C for 60 min. Two separate sets of substrates were used: the labelled substrates (light grey) were formed by hybridization of D3+C with D1, and the cold substrates (dark grey) by hybridization of D4GC with D2-P.

**A**

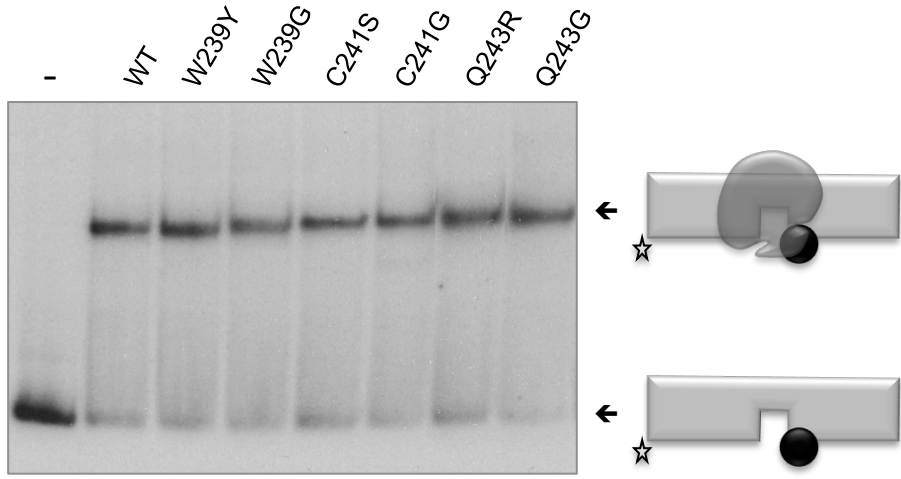

**B**

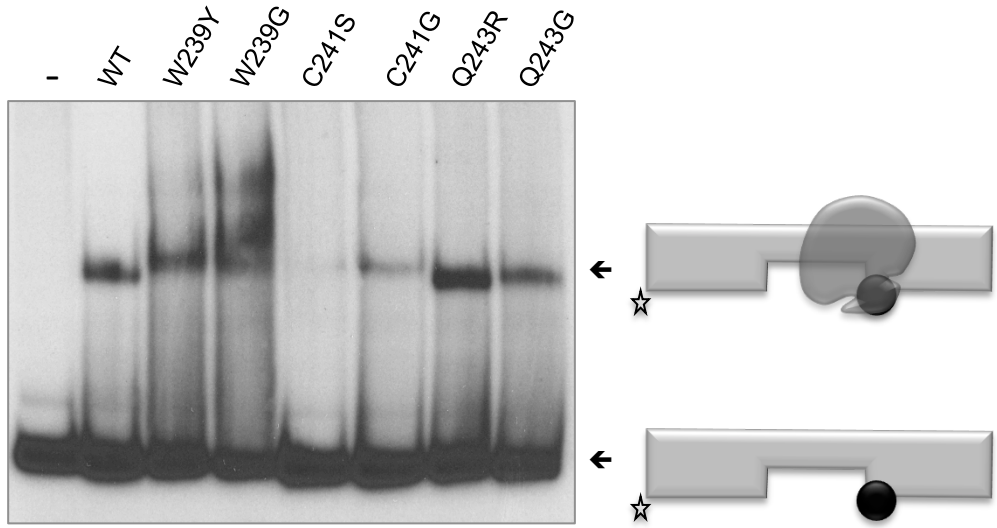

**C**

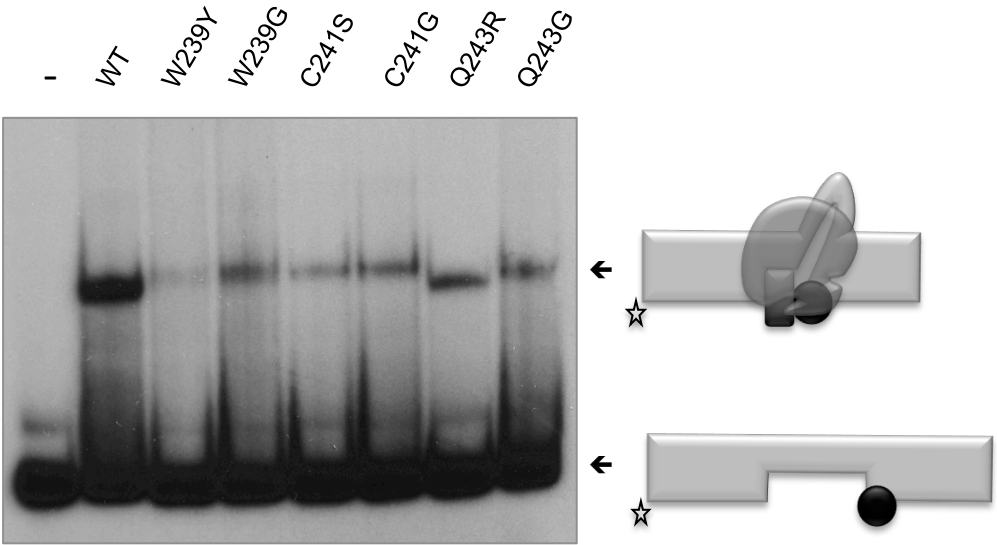



**Supplementary Figure 4. The brooch in Pol $\lambda$  is implicated in correct binding to long gaps.** A) EMSA was performed for the wild-type Pol $\lambda$  and the indicated mutants (50 nM) using 3 nM gapped substrate containing the oligonucleotides FP-P, FP-T and FP-D. Reactions were incubated for 15 min at 30 °C. After electrophoresis, gel was dried and the labelled fragments were detected by autoradiography. B) EMSA was performed as in A) for the wild-type Pol $\lambda$  and the indicated mutants (300 nM) using 3 nM gapped substrate containing the oligonucleotides FP-P, FP-T5 and FP-D. C) EMSA was performed as in B) but adding 1  $\mu$ M ddTTP and 2.5 mM MgCl<sub>2</sub>.

FT-T (5'-GGCAGCTTGGATCTTGTTCGAAAAACGTCAACATTTCGCCTAGGCTTCGGCAAT  
ACTGAGGTCTTGTTCGAAAAACGTCAACATTGCGTGGCC)

FT-P (5'-GGCCACGCAATGTTGACGTTTTTCGACAAGACCTCAGTAT)

FT-D (contains a 5'P group)  
(5'-GCCGAAGCCTAGGCGAATGTTGACGTTTTTCGACAAGATCCAAGCTGCC)

FT-T5 (5'-GGCAGCTTGGATCTTGTTCGAAAAACGTCAACATTTCGCCTAGGCTTCGGCAG  
CATATACTGAGGTCTTGTTCGAAAAACGTCAACATTGCGTGGCC).

A

| Pol $\mu$            |           |
|----------------------|-----------|
| <i>H. sapiens</i>    | YACQRPTPL |
| <i>P. abelii</i>     | YACQRPTPL |
| <i>P. anubis</i>     | YACQRPTPL |
| <i>R. norvegicus</i> | YACQRPSPL |
| <i>M. musculus</i>   | YACQRPSPL |
| <i>B. taurus</i>     | YACQRPTPL |
| <i>S. scrofa</i>     | YACQRPTPL |
| <i>C. griseus</i>    | YACQRPTAL |
| <i>D. rerio</i>      | YACQRRTPL |
| <i>X. tropicalis</i> | YGCQRRTPL |

| TdT                 |            |
|---------------------|------------|
| <i>H. sapiens</i>   | YACQRRTTL  |
| <i>P. abelii</i>    | YACQRRTTL  |
| <i>M. mulatta</i>   | YACQRRTTL  |
| <i>S. scrofa</i>    | YACQRRTTL  |
| <i>B. taurus</i>    | YACQRKTTL  |
| <i>C. lupus</i>     | YACQRRTTL  |
| <i>M. musculus</i>  | YACQRRTTL  |
| <i>M. domestica</i> | YACQRRTTL  |
| <i>D. rerio</i>     | YACQRRTTL  |
| <i>X. laevis</i>    | YACQRC TTL |

| Pol $\lambda$        |            |
|----------------------|------------|
| <i>H. sapiens</i>    | WVCAQPSSQ  |
| <i>P. abelii</i>     | WVCAQPSSQ  |
| <i>M. mulatta</i>    | WVCAQPSSQ  |
| <i>R. norvegicus</i> | WVCAQPSSQ  |
| <i>M. musculus</i>   | WVCAQPSSQ  |
| <i>B. taurus</i>     | WVCAQPSSQ  |
| <i>M. domestica</i>  | WVCAQPSSQ  |
| <i>C. lupus</i>      | WVCAQPSSQ  |
| <i>D. rerio</i>      | WVCSQPSTT  |
| <i>X. tropicalis</i> | WVCAHSSSES |

| Ascomycota Pol $\mu$ -like |           |
|----------------------------|-----------|
| <i>S. pombe</i>            | YACQRKTPL |
| <i>D. squalens</i>         | YACQRPSPL |
| <i>S. hirsutum</i>         | FACERPSP  |
| <i>C. cinerea</i>          | YVQRASPL  |
| <i>T. versicolor</i>       | YACQRASPL |
| <i>S. commune</i>          | YACCRASPL |
| <i>P. indica</i>           | YCCQRQTPL |
| <i>L. bicolor</i>          | YACKRASPL |
| <i>U. maydis</i>           | YACRRPSPL |
| <i>M. osmundae</i>         | YSCMRLSPR |
| <i>C. militaris</i>        | YSCQRPTPM |

| Ascomycota Pol $\lambda$ -like |          |
|--------------------------------|----------|
| <i>A. nidulans</i>             | FVCMQKHD |
| <i>A. clavatus</i>             | FTCMQKHD |
| <i>A. oryzae</i>               | FACVQKHD |
| <i>A. flavus</i>               | FACVQKHD |
| <i>A. niger</i>                | FACMQKHD |
| <i>A. terreus</i>              | FACMRAHD |
| <i>A. capsulatus</i>           | FSCMHKHD |
| <i>A. otae</i>                 | FSCMGKMD |
| <i>T. rubrum</i>               | FTCMNKMD |
| <i>V. dahliae</i>              | FACTRGGL |

B

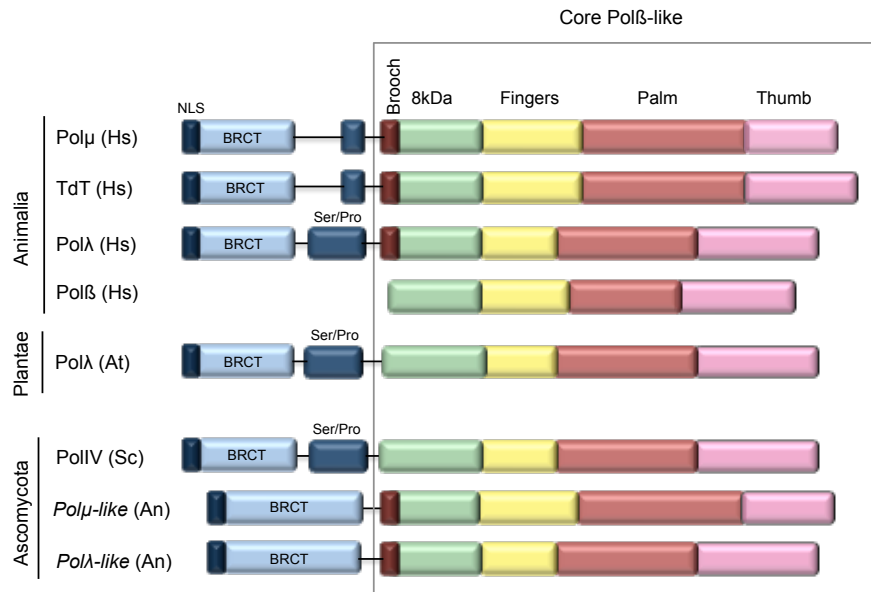

**Supplementary Figure 5. Evolution of the brooch.** A) Multiple sequence alignment of the N-terminal boundary of the 8 kDa domain (containing the brooch) of different PolXs belonging to the three higher eukaryotic kingdoms of life: animals, fungi and plants. These have been used to generate the sequence logos in figure 8. B) Schemes showing the domains present in PolXs from different kingdoms.
